# Supplementary material
Source: Springer Nature journal article supplement (https://www.springermedizin.de/resource/supplementary/13030_2010_76_MOESM1_ESM.pdf/9644682)
Supplement: MOESM1 [file 9644682]

$$\text{Illness index} = \frac{\text{Stress (e.g., poor environment for workers and poor working condition)}}{\text{Resillience (e.g., health control using annual check - ups)}}$$
